# Supplementary material for: System Analysis of LWDH Related Genes Based on Text Mining in Biological Networks
Source: Biomed Res Int. 2014 Aug 27;2014:484926. doi: 10.1155/2014/484926 (PMC4163428; doi:10.1155/2014/484926)
Supplement: Supplementary file 1 — These supplementary informations include the primary reference results of text mining, LWDH related genes in human and the comprehensive network of LWDH. [file 484926.f1.txt]

Pubmed ID	Tax id	Gene ID	Gene Symbol
19569730	9606	1544	CYP1A2
17265558	9606	7299	TYR
21048105	10090	15218	Foxn1
21048105	10090	20371	Foxp3
15494553	358	1224319
11273700	359	874677
11273700	359	874678
11273700	359	874679
11273700	359	874680
11273700	359	874681
11273700	359	874682
11273700	359	874683
11273700	359	874684
11273700	359	874685
11273700	359	874686
11273700	359	874687
11273700	359	874688
11273700	359	874689
11273700	359	874690
11273700	359	874691
11273700	359	874692
11273700	359	874693
11273700	359	874694
11273700	359	874695
11273700	359	874696
11273700	359	874697
11273700	359	874698
11273700	359	874699
11273700	359	874700
11273700	359	874701
11273700	359	874702
11273700	359	874703
11273700	359	874704
11273700	359	874705
11273700	359	874706
11273700	359	874707
11273700	359	874708
11273700	359	874709
11273700	359	874710
11273700	359	874711
11273700	359	874712
11273700	359	874713
11273700	359	874714
11273700	359	874715
11273700	359	874716
11273700	359	874717
11273700	359	874718
11273700	359	874719
11273700	359	874720
11273700	359	874721
11273700	359	874722
11273700	359	874723
11273700	359	874724
11273700	359	874725
11273700	359	874726
11273700	359	874727
11273700	359	874728
11273700	359	874729
11273700	359	874730
11273700	359	874731
11273700	359	874732
11273700	359	874733
11273700	359	874734
11273700	359	874735
11273700	359	874736
11273700	359	874737
11273700	359	874738
11273700	359	874739
11273700	359	874740
11273700	359	874741
11273700	359	874742
11273700	359	874743
11273700	359	874744
11273700	359	874745
11273700	359	874746
11273700	359	874747
11273700	359	874748
11273700	359	874749
11273700	359	874750
11273700	359	874751
11273700	359	874752
11273700	359	874753
11273700	359	874754
11273700	359	874755
11273700	359	874756
11273700	359	874757
11273700	359	874758
11273700	359	874759
11273700	359	874760
11273700	359	874761
11273700	359	874762
11273700	359	874763
11273700	359	874764
11273700	359	874765
11273700	359	874766
11273700	359	874767
11273700	359	874768
11273700	359	874769
11273700	359	874770
11273700	359	874771
11273700	359	874772
11273700	359	874773
11273700	359	874774
11273700	359	874775
11273700	359	874776
11273700	359	874777
11273700	359	874778
11273700	359	874779
11273700	359	874780
11273700	359	874781
11273700	359	874782
11273700	359	874783
11273700	359	874784
11273700	359	874785
11273700	359	874786
11273700	359	874787
11273700	359	874788
11273700	359	874789
11273700	359	874790
11273700	359	874791
11273700	359	874792
11273700	359	874793
11273700	359	874794
11273700	359	874795
11273700	359	874796
11273700	359	874797
11273700	359	874798
11273700	359	874799
11273700	359	874800
11273700	359	874801
11273700	359	874802
11273700	359	874803
11273700	359	874804
11273700	359	874805
11273700	359	874806
11273700	359	874807
11273700	359	874808
11273700	359	874809
11273700	359	874810
11273700	359	874811
11273700	359	874812
11273700	359	874813
11273700	359	874814
11273700	359	874815
11273700	359	874816
11273700	359	874817
11273700	359	874818
11273700	359	874819
11273700	359	874820
11273700	359	874821
11273700	359	874822
11273700	359	874823
11273700	359	874824
11273700	359	874825
11273700	359	874826
11273700	359	874827
11273700	359	874828
11273700	359	874829
11273700	359	874830
11273700	359	874831
11273700	359	874832
11273700	359	874833
11273700	359	874834
11273700	359	874835
11273700	359	874836
11273700	359	874837
11273700	359	874838
11273700	359	874839
11273700	359	874840
11273700	359	874841
11273700	359	874842
11273700	359	874843
11273700	359	874844
11273700	359	874845
11273700	359	874846
11273700	359	874847
11273700	359	874848
11273700	359	874849
19019163	394	962533
21637551	549	9284704
21637551	549	9284705
21637551	549	9284706
21637551	549	9284707
19470589	3055	5723425
19470589	3055	5728180
16950863	3659	101202796
16781795	3659	101203658
8342953	3659	101204918
15045660	3659	101206629
22099519	3659	101208936
16773375	3659	101209294
22099519	3659	101210217
22959675	3659	101210349
12644694	3659	101210435
22099519	3659	101212256
15159636	3659	101213704
15499908	3659	101213932
22959675	3659	101214088
23860231	3659	101215805
21497714	3659	101216001
11710397	3659	101216168
18342986	3659	101216234
15045660	3659	101216379
15032830	3659	101217216
15032830	3659	101217842
15045660	3659	101218255
15045660	3659	101218512
21497714	3659	101219000
15120117	3659	101219179
15854837	3659	101221020
12154142	3659	101221088
22099519	3659	101222715
11710397	3659	101222936
12154142	3659	101223028
19684242	3694	7464826
22268151	3694	7475620
20971897	3694	7479083
21564099	3694	7484240
22715043	3694	7490606
21553109	3694	7493197
21564099	3694	7495517
20682769	3702	814592
21501262	3702	814645
11278556	3702	814646
17568770	3702	814654
17059404	3702	814657
12535344	3702	814665
11893337	3702	814670
15635403	3702	814670
17889649	3702	814670
19880797	3702	814670
22715043	3702	814670
15659481	3702	814678
16526091	3702	814681
19880396	3702	814681
16526091	3702	814682
16400150	3702	814686
23033541	3702	814686
11114883	3702	814714
15144379	3702	814714
15155880	3702	814714
15923327	3702	814714
16357038	3702	814714
16361392	3702	814714
21426428	3702	814714
9210330	3702	814725
11874577	3702	814729
19758408	3702	814729
20054031	3702	814729
22195582	3702	814729
23307916	3702	814729
9232875	3702	814735
21813283	3702	814741
21813283	3702	814743
21813283	3702	814744
19076296	3702	814753
23083315	3702	814753
16045473	3702	814786
18849490	3702	814805
14739351	3702	814817
18024556	3702	814823
18266898	3702	814823
16942607	3702	814838
18067581	3702	814841
19168645	3702	814841
21831845	3702	814846
20016941	3702	814873
19966073	3702	814891
11003843	3702	814896
15084720	3702	814896
15155883	3702	814896
16478750	3702	814896
7632923	3702	814898
15530395	3702	814898
16367956	3702	814899
8639757	3702	814903
10080694	3702	814953
17616510	3702	814996
18423007	3702	814997
19000167	3702	814997
12881501	3702	815006
10080694	3702	815031
16673933	3702	815036
17287892	3702	815093
17916636	3702	815120
21540433	3702	815134
12974814	3702	815176
22010978	3702	815211
10557219	3702	815247
19357199	3702	815415
11553816	3702	815657
18808455	3702	815657
21607647	3702	815830
23136377	3702	815840
17916636	3702	815842
20108170	3702	815862
22525267	3702	815862
9430595	3702	815907
10938795	3702	815907
15667327	3702	815907
16021502	3702	815907
16339770	3702	815907
22523192	3702	815907
11725949	3702	815945
10561538	3702	815960
10871276	3702	815960
10888666	3702	815960
10561538	3702	815962
10871276	3702	815962
10888666	3702	815962
15659623	3702	815985
17517886	3702	816050
19218459	3702	816050
18441215	3702	816074
9342391	3702	816103
21941000	3702	816141
19357199	3702	816142
7948903	3702	816156
9426607	3702	816161
19794115	3702	816171
22492352	3702	816176
21607647	3702	816177
7780305	3702	816244
8302869	3702	816244
17586656	3702	816248
16099979	3702	816286
20097794	3702	816287
23362252	3702	816289
10488240	3702	816291
9865698	3702	816305
10761929	3702	816305
15342527	3702	816305
15952065	3702	816305
15980263	3702	816305
16372013	3702	816305
16461579	3702	816305
16877025	3702	816305
17429400	3702	816305
17461786	3702	816305
18591352	3702	816305
18653559	3702	816305
19717465	3702	816305
19897670	3702	816305
20493817	3702	816305
20876644	3702	816305
21406977	3702	816305
22028461	3702	816305
22076631	3702	816305
23181633	3702	816305
9247544	3702	816317
20388856	3702	816318
18047472	3702	816354
19566594	3702	816362
14686433	3702	816394
15695459	3702	816394
17251203	3702	816394
17419844	3702	816394
18266898	3702	816394
20551316	3702	816394
22904146	3702	816394
17674032	3702	816395
19549134	3702	816413
22010978	3702	816413
15100400	3702	816428
15498553	3702	816428
17434989	3702	816428
19076718	3702	816428
12702015	3702	816434
17237187	3702	816459
23616604	3702	816464
17827277	3702	816467
14555694	3702	816469
15173595	3702	816478
11340190	3702	816495
19691674	3702	816499
16113210	3702	816509
9425146	3702	816519
12368267	3702	816519
16938844	3702	816519
21784786	3702	816533
17873093	3702	816539
22500804	3702	816539
17675405	3702	816553
17916636	3702	816555
17237187	3702	816567
22010978	3702	816580
8589625	3702	816585
16377752	3702	816585
15673576	3702	816614
16582010	3702	816623
20498364	3702	816633
16478044	3702	816640
19952011	3702	816640
22773749	3702	816640
10594096	3702	816649
21163961	3702	816650
20872270	3702	816671
16461582	3702	816680
16697077	3702	816693
10737146	3702	816698
21909944	3702	816700
19880396	3702	816705
20616083	3702	816747
22427339	3702	816747
11123795	3702	816757
15772288	3702	816765
17675405	3702	816765
10527431	3702	816775
17450124	3702	816780
12468727	3702	816782
15501911	3702	816782
21357490	3702	816782
22547095	3702	816782
11439126	3702	816787
18694458	3702	816787
19656342	3702	816787
19656343	3702	816787
17335512	3702	816789
19825598	3702	816795
22912871	3702	816798
15699063	3702	816812
20511490	3702	816812
10350086	3702	816814
12974814	3702	816815
22419826	3702	816815
16581911	3702	816816
15286287	3702	816845
15840645	3702	816845
12787249	3702	816847
14690510	3702	816847
19121106	3702	816847
22998565	3702	816847
15659623	3702	816849
22730403	3702	816849
10737146	3702	816863
22010978	3702	816867
16957776	3702	816870
17827277	3702	816870
19097900	3702	816870
21441433	3702	816870
22028461	3702	816870
17999646	3702	816878
19515790	3702	816879
19168716	3702	816883
18467465	3702	816888
18467465	3702	816890
18467465	3702	816891
18467465	3702	816892
18467465	3702	816893
18467465	3702	816894
20694742	3702	816939
10662864	3702	816956
19675148	3702	816961
16326925	3702	816985
22291198	3702	817013
23124326	3702	817014
16339850	3702	817016
17675405	3702	817022
22693280	3702	817022
21167067	3702	817039
17898163	3702	817047
21596690	3702	817047
19168716	3702	817053
9204906	3702	817055
10570159	3702	817055
16359393	3702	817055
17010112	3702	817055
19680533	3702	817055
21357580	3702	817055
21441433	3702	817055
16227453	3702	817056
17132632	3702	817056
18037673	3702	817056
18723577	3702	817056
21105923	3702	817056
12535344	3702	817106
18003916	3702	817109
18454190	3702	817109
21131548	3702	817109
19922653	3702	817123
22045917	3702	817129
8893545	3702	817134
17999643	3702	817148
11874909	3702	817157
22673766	3702	817166
12068128	3702	817170
14500984	3702	817170
16582010	3702	817170
17383830	3702	817170
18499742	3702	817170
20862254	3702	817170
11910003	3702	817173
16002616	3702	817173
16126863	3702	817173
21427109	3702	817173
22885615	3702	817173
23578929	3702	817173
16648215	3702	817180
18178770	3702	817182
18281506	3702	817182
19795213	3702	817195
17075075	3702	817197
19837869	3702	817199
12554721	3702	817206
12678562	3702	817206
15734909	3702	817206
16895985	3702	817206
17898163	3702	817206
19000196	3702	817206
19509299	3702	817206
20413648	3702	817206
20514083	3702	817206
21596690	3702	817206
23331977	3702	817206
21205037	3702	817208
22424472	3702	817208
17237187	3702	817211
7920716	3702	817215
11337587	3702	817241
17307927	3702	817241
22576848	3702	817241
20554213	3702	817245
21457371	3702	817246
12606727	3702	817247
21586684	3702	817247
21737749	3702	817247
16222298	3702	817252
23136377	3702	817252
23125358	3702	817261
17626058	3702	817265
23362345	3702	817265
10915624	3702	817267
12034890	3702	817267
16055633	3702	817267
16210497	3702	817267
16603652	3702	817267
16751438	3702	817267
16902141	3702	817267
18202283	3702	817267
18381924	3702	817267
18848920	3702	817267
19088334	3702	817267
19525968	3702	817267
20738721	3702	817267
20978082	3702	817267
21052783	3702	817267
21333538	3702	817267
21499263	3702	817267
22058024	3702	817267
22259020	3702	817267
22923673	3702	817267
23181633	3702	817267
23256149	3702	817267
22702636	3702	817302
11319029	3702	817340
11432958	3702	817340
15120075	3702	817343
16741748	3702	817343
18298668	3702	817343
19175771	3702	817343
21505100	3702	817343
21822063	3702	817343
15539473	3702	817362
16117851	3702	817362
17466530	3702	817362
19154225	3702	817362
21426424	3702	817362
21586684	3702	817362
22983953	3702	817362
17407539	3702	817367
15833920	3702	817375
17287810	3702	817376
16006581	3702	817382
19820192	3702	817382
20563990	3702	817399
16461582	3702	817400
15952068	3702	817404
19073779	3702	817410
19482972	3702	817410
19461889	3702	817416
9247544	3702	817423
16581911	3702	817430
16112663	3702	817438
16942607	3702	817444
16804053	3702	817462
7678768	3702	817489
15923336	3702	817498
17916636	3702	817504
19223001	3702	817505
18494853	3702	817506
16478044	3702	817515
18086223	3702	817515
18443422	3702	817525
16829588	3702	817546
8029334	3702	817548
9477572	3702	817558
16478044	3702	817559
18676662	3702	817574
18839316	3702	817575
10871276	3702	817579
10888666	3702	817579
20971704	3702	817583
11402167	3702	817586
17483306	3702	817586
20418496	3702	817586
21777855	3702	817586
9753778	3702	817589
22087276	3702	817595
9085570	3702	817599
16526091	3702	817636
19880396	3702	817636
16526091	3702	817637
16489133	3702	817661
19515790	3702	817675
20562234	3702	817675
19794115	3702	817676
8605295	3702	817682
17085765	3702	817683
22773747	3702	817684
1844885	3702	817695
17916636	3702	817719
16367966	3702	817721
19567704	3702	817721
18713401	3702	817722
17259290	3702	817725
21628627	3702	817746
16513816	3702	817749
7890743	3702	817754
20526604	3702	817757
16162503	3702	817764
11402207	3702	817771
9618566	3702	817787
11743113	3702	817807
19880396	3702	817813
19837869	3702	817830
20797995	3702	817833
21628630	3702	817844
22057342	3702	817844
21998686	3702	817856
7753789	3702	817857
9659918	3702	817857
16339850	3702	817857
18296627	3702	817857
18434413	3702	817857
21972261	3702	817857
22912415	3702	817857
18768911	3702	817872
22022536	3702	817874
22109847	3702	817885
14729917	3702	817894
22683260	3702	817911
22683261	3702	817911
20388856	3702	817913
18305006	3702	817919
22627139	3702	817935
10662864	3702	817941
9637070	3702	817943
16303564	3702	817943
16679417	3702	817943
18390805	3702	817943
21748325	3702	817943
22634761	3702	817943
19686687	3702	817948
9409666	3702	817956
15753038	3702	817958
20110319	3702	817958
19825598	3702	817976
21972261	3702	817976
16954136	3702	818002
17584741	3702	818002
21335373	3702	818025
10693763	3702	818030
15514156	3702	818030
16731587	3702	818030
17237187	3702	818030
17889649	3702	818030
19363095	3702	818030
20040538	3702	818030
20823065	3702	818030
21542343	3702	818030
18325934	3702	818031
10080694	3702	818033
9655815	3702	818036
15286295	3702	818036
16581911	3702	818036
22902752	3702	818036
18980659	3702	818043
10561538	3702	818059
10871276	3702	818059
10888666	3702	818059
22270560	3702	818076
15516496	3702	818077
16731582	3702	818088
16112663	3702	818102
17079273	3702	818102
18606144	3702	818102
20348433	3702	818102
21460611	3702	818102
21172813	3702	818116
19017745	3702	818130
15753108	3702	818131
16377747	3702	818131
22048901	3702	818138
18723362	3702	818139
19808946	3702	818142
15710607	3702	818167
17397506	3702	818167
17287810	3702	818172
16514015	3702	818174
22003076	3702	818174
17194765	3702	818199
19276109	3702	818199
22822206	3702	818199
19293370	3702	818204
12535344	3702	818207
17237187	3702	818208
12974814	3702	818213
22419826	3702	818213
17881564	3702	818219
17916636	3702	818220
16526091	3702	818226
17916636	3702	818226
15618414	3702	818232
17905861	3702	818255
19229639	3702	818255
19734435	3702	818255
19922653	3702	818255
19067977	3702	818258
16526091	3702	818260
16461581	3702	818262
14517332	3702	818265
15908594	3702	818265
16212599	3702	818265
16478044	3702	818265
16887800	3702	818265
18156217	3702	818265
23321285	3702	818265
17322407	3702	818285
17379696	3702	818285
21607647	3702	818292
7920711	3702	818293
16235111	3702	818293
16235111	3702	818294
17287810	3702	818298
15618410	3702	818302
21803861	3702	818302
17766401	3702	818303
12223767	3702	818310
15659095	3702	818310
12176998	3702	818311
16581911	3702	818336
17583520	3702	818336
12481103	3702	818339
16243907	3702	818340
19891706	3702	818340
22554014	3702	818340
22822207	3702	818340
16942607	3702	818341
12650623	3702	818369
18086223	3702	818384
21447792	3702	818386
8688077	3702	818390
11641271	3702	818390
16478044	3702	818390
16690816	3702	818390
16839804	3702	818390
17084699	3702	818390
17114355	3702	818390
17215297	3702	818390
18622388	3702	818390
19079245	3702	818390
19448626	3702	818390
19952011	3702	818390
20110325	3702	818390
21342208	3702	818390
23293348	3702	818390
10559438	3702	818395
16055687	3702	818395
21546457	3702	818395
17227548	3702	818402
15044016	3702	818404
12481062	3702	818409
16478044	3702	818409
19635480	3702	818409
21436041	3702	818411
17916636	3702	818419
19880396	3702	818419
17916636	3702	818420
18839316	3702	818429
10940464	3702	818435
11432958	3702	818444
17189343	3702	818449
17916636	3702	818453
15161963	3702	818457
16531057	3702	818457
16531057	3702	818458
9872450	3702	818479
19508364	3702	818479
16478044	3702	818487
16478044	3702	818520
17494768	3702	818530
16942607	3702	818553
8819320	3702	818558
11226227	3702	818562
16720601	3702	818562
19011088	3702	818562
20007685	3702	818562
8506358	3702	818563
21749503	3702	818570
23296689	3702	818570
7678768	3702	818571
8776904	3702	818576
15618414	3702	818576
20525008	3702	818581
20699268	3702	818581
22635114	3702	818581
22658222	3702	818581
23349138	3702	818581
23170036	3702	818588
12662310	3702	818614
21097710	3702	818614
21448003	3702	818614
21504878	3702	818614
19959254	3702	818622
20395451	3702	818627
16478044	3702	818640
20306306	3702	818641
16942607	3702	818656
12354925	3702	818662
16596410	3702	818682
21691153	3702	818682
16377748	3702	818686
16405932	3702	818686
7827491	3702	818709
18281506	3702	818720
9596633	3702	818721
17516080	3702	818723
22983953	3702	818723
9607306	3702	818730
19482972	3702	818735
20626659	3702	818735
14555694	3702	818749
17363254	3702	818749
16478044	3702	818754
17360591	3702	818764
21940997	3702	818764
22285304	3702	818764
23012350	3702	818764
15292215	3702	818766
19470473	3702	818766
22505729	3702	818766
22209875	3702	818773
10632732	3702	818788
21803862	3702	818794
18492871	3702	818820
22167059	3702	818827
15295067	3702	818841
22904146	3702	818841
17259263	3702	818843
19717544	3702	818843
22278921	3702	818843
22699776	3702	818843
23167545	3702	818850
22010978	3702	818852
11874909	3702	818862
7655508	3702	818874
10483121	3702	818884
16461585	3702	818890
16473967	3702	818890
23161888	3702	818908
18067581	3702	818909
17916636	3702	818911
9349270	3702	818944
17369371	3702	818982
19832943	3702	818982
20870959	3702	818982
21940998	3702	818982
22236066	3702	818982
23075039	3702	819019
20530756	3702	819035
8159788	3702	819069
11402030	3702	819073
20551316	3702	819077
17237187	3702	819092
16434475	3702	819099
23578926	3702	819100
17329565	3702	819104
18849490	3702	819104
21243360	3702	819107
21070418	3702	819124
21173022	3702	819124
9878633	3702	819127
10323860	3702	819127
10331982	3702	819127
18469164	3702	819127
19837869	3702	819127
20584289	3702	819127
17521414	3702	819146
19230664	3702	819146
23737757	3702	819146
19717544	3702	819150
22003076	3702	819150
22699776	3702	819150
11069709	3702	819152
12974814	3702	819156
10834834	3702	819174
11439126	3702	819174
15695467	3702	819174
19656343	3702	819174
21609362	3702	819174
22902690	3702	819174
16040658	3702	819177
16813577	3702	819185
17916636	3702	819187
7920711	3702	819204
16235111	3702	819204
20034965	3702	819204
21186174	3702	819204
22010978	3702	819204
15371304	3702	819210
19000167	3702	819215
21607647	3702	819219
1373374	3702	819235
17916636	3702	819236
20864543	3702	819242
15258265	3702	819244
9262483	3702	819249
10589676	3702	819249
11326047	3702	819249
12356720	3702	819249
12403712	3702	819249
14627722	3702	819249
15795220	3702	819249
16291794	3702	819249
17644729	3702	819249
18816165	3702	819249
21914815	3702	819249
17675405	3702	819262
22948308	3702	819262
18952777	3702	819290
10069843	3702	819293
15946891	3702	819293
19433490	3702	819293
19795213	3702	819297
10725242	3702	819306
12573213	3702	819306
17079273	3702	819306
18606144	3702	819306
20348433	3702	819306
21460611	3702	819306
18298415	3702	819313
16243904	3702	819314
17557805	3702	819314
18156217	3702	819314
22492845	3702	819314
12447444	3702	819329
16103374	3702	819329
20194745	3702	819329
22301967	3702	819329
17031393	3702	819332
23154535	3702	819332
19795213	3702	819335
19795213	3702	819336
22307611	3702	819339
21074051	3702	819340
15533878	3702	819353
18974062	3702	819353
22829145	3702	819355
17916636	3702	819364
10571852	3702	819386
16829588	3702	819386
17670748	3702	819386
17916636	3702	819386
18334669	3702	819386
17216483	3702	819387
16478044	3702	819392
22751378	3702	819402
7919990	3702	819424
21868675	3702	819549
17434987	3702	819563
23071251	3702	819563
15533878	3702	819567
17916636	3702	819567
16473894	3702	819579
19783645	3702	819602
17376028	3702	819609
12586874	3702	819621
18971429	3702	819626
17916636	3702	819632
22693280	3702	819632
22580954	3702	819633
12426376	3702	819634
17059404	3702	819639
12535344	3702	819653
22206669	3702	819662
16668615	3702	819664
12620976	3702	819666
16581911	3702	819677
12554710	3702	819685
17964159	3702	819697
17158604	3702	819725
16384909	3702	819730
16617110	3702	819730
16891548	3702	819730
19915862	3702	819730
12856935	3702	819743
16034593	3702	819757
21176196	3702	819773
20215588	3702	819774
15632145	3702	819778
21421810	3702	819779
21710975	3702	819783
17766401	3702	819827
19881525	3702	819827
17140818	3702	819832
22437845	3702	819837
18725356	3702	819865
22010978	3702	819865
17324374	3702	819887
22058024	3702	819890
22357616	3702	819890
19587103	3702	819899
19633233	3702	819899
17586653	3702	819911
10080694	3702	819927
19783645	3702	819945
10080694	3702	819948
19880396	3702	819963
18403411	3702	819969
19392692	3702	819969
22378640	3702	819969
11041890	3702	819979
16355224	3702	819979
18281506	3702	819987
12172022	3702	819995
17351051	3702	819995
23236296	3702	819995
21607647	3702	819998
21551390	3702	820001
12215501	3702	820002
14742875	3702	820002
20133584	3702	820018
17237187	3702	820019
17237187	3702	820020
21924907	3702	820027
15845148	3702	820032
9536051	3702	820039
18980646	3702	820049
8893545	3702	820069
17916636	3702	820076
19880396	3702	820076
12581307	3702	820082
15919674	3702	820082
16526091	3702	820082
17916636	3702	820082
18248598	3702	820082
18467340	3702	820082
19965874	3702	820082
21607647	3702	820082
15486103	3702	820085
9112777	3702	820098
11402207	3702	820102
16407262	3702	820118
17960039	3702	820118
22291198	3702	820135
11115893	3702	820140
11891238	3702	820140
16526091	3702	820140
15498773	3702	820142
18660433	3702	820142
17220200	3702	820151
18281506	3702	820151
17916636	3702	820155
19386380	3702	820155
19571310	3702	820166
23129207	3702	820179
9342391	3702	820216
21741261	3702	820216
14749726	3702	820219
22010978	3702	820233
21294795	3702	820242
18344421	3702	820243
18467465	3702	820257
17916636	3702	820263
18337490	3702	820263
19880396	3702	820263
10809011	3702	820273
21551390	3702	820284
9368411	3702	820288
15894610	3702	820292
20080602	3702	820292
17916636	3702	820296
16262712	3702	820297
17429400	3702	820297
21744091	3702	820297
22076631	3702	820297
22080599	3702	820307
12034902	3702	820314
16361522	3702	820314
21596690	3702	820314
23370718	3702	820314
17259262	3702	820316
17496107	3702	820316
11743113	3702	820317
12068105	3702	820327
10973486	3702	820339
19794113	3702	820355
16478044	3702	820363
16478044	3702	820384
15681664	3702	820398
19176721	3702	820398
9225852	3702	820405
23349138	3702	820405
16377572	3702	820408
17024182	3702	820408
20525851	3702	820408
21742994	3702	820408
22921914	3702	820408
23104828	3702	820408
11891255	3702	820416
17916636	3702	820418
11402207	3702	820438
18344284	3702	820456
9618566	3702	820457
17905859	3702	820458
12837955	3702	820463
19467746	3702	820498
16117846	3702	820513
17158604	3702	820529
14660546	3702	820530
17158604	3702	820530
17513503	3702	820530
17600715	3702	820536
18992236	3702	820556
19136646	3702	820556
12176998	3702	820559
18547395	3702	820564
12068108	3702	820600
12354956	3702	820600
15908600	3702	820600
21652628	3702	820600
22010978	3702	820605
12974814	3702	820609
12881501	3702	820635
20357136	3702	820643
21173023	3702	820647
19001564	3702	820651
21692803	3702	820651
16460509	3702	820658
17237187	3702	820658
20823065	3702	820658
12834401	3702	820667
22232384	3702	820724
20023165	3702	820732
19666737	3702	820746
19682286	3702	820746
20592809	3702	820746
23426194	3702	820746
10750709	3702	820748
16359384	3702	820748
18346190	3702	820748
16021341	3702	820752
19214436	3702	820768
9112777	3702	820771
16359384	3702	820790
14729917	3702	820793
17369427	3702	820793
20636903	3702	820793
10198096	3702	820816
21625539	3702	820816
22010978	3702	820816
16461579	3702	820831
16763149	3702	820831
17916636	3702	820839
15665250	3702	820870
17905861	3702	820870
19734435	3702	820870
23199690	3702	820881
17122069	3702	820883
15919674	3702	820890
16526091	3702	820890
19965874	3702	820890
16526091	3702	820891
19880396	3702	820893
16526091	3702	820894
17675405	3702	820895
17916636	3702	820895
19473327	3702	820907
19939242	3702	820915
19060111	3702	820916
21917552	3702	820925
11018516	3702	820929
16384909	3702	820932
16617110	3702	820932
16891548	3702	820932
16763149	3702	820936
21335373	3702	820936
16227453	3702	820940
18037673	3702	820940
18502977	3702	820940
18723577	3702	820940
19039136	3702	820940
21105923	3702	820940
23443557	3702	820940
20488895	3702	820951
9484444	3702	820960
11598235	3702	820984
22744179	3702	820995
16682350	3702	820999
21596690	3702	821016
18298415	3702	821026
17121469	3702	821027
19943938	3702	821036
16478044	3702	821037
19943938	3702	821037
14757761	3702	821050
16526091	3702	821050
16623888	3702	821052
21532992	3702	821053
17237187	3702	821054
20525008	3702	821055
21321051	3702	821055
21335373	3702	821055
17189342	3702	821081
21187379	3702	821081
22198148	3702	821097
14617097	3702	821114
16478044	3702	821117
16623890	3702	821132
17916636	3702	821147
11156607	3702	821148
18768911	3702	821148
21471331	3702	821148
21765420	3702	821148
19880396	3702	821160
17916636	3702	821163
22786889	3702	821165
19710229	3702	821181
17195036	3702	821182
20868530	3702	821191
16699540	3702	821214
21658178	3702	821214
22911780	3702	821228
9536051	3702	821233
17916636	3702	821233
20965998	3702	821240
20978082	3702	821240
22835273	3702	821240
15618226	3702	821243
21525137	3702	821243
16400150	3702	821251
23033541	3702	821251
18931139	3702	821259
15084720	3702	821277
15247387	3702	821286
11569502	3702	821287
7816049	3702	821292
11278556	3702	821299
11525517	3702	821313
17916636	3702	821313
18395530	3702	821313
15295103	3702	821324
22791820	3702	821324
21658178	3702	821325
18947417	3702	821338
20675571	3702	821357
12904214	3702	821378
17827277	3702	821382
14966212	3702	821404
15125773	3702	821404
15964904	3702	821404
16728410	3702	821404
21984698	3702	821408
12481103	3702	821411
15863435	3702	821411
18281506	3702	821411
19304937	3702	821411
23362252	3702	821415
15525644	3702	821416
15598803	3702	821416
8998499	3702	821432
16682350	3702	821439
15464981	3702	821449
21607647	3702	821455
18209955	3702	821456
11884679	3702	821463
12805615	3702	821479
10806347	3702	821495
15333755	3702	821495
21852415	3702	821495
19966073	3702	821501
18055610	3702	821514
7828854	3702	821519
21624980	3702	821519
21607647	3702	821524
8989877	3702	821531
18179725	3702	821534
22715043	3702	821536
15820655	3702	821577
16679419	3702	821601
19969521	3702	821610
15995349	3702	821611
12606727	3702	821625
21586684	3702	821625
21737749	3702	821625
9165126	3702	821626
17237187	3702	821631
15454085	3702	821632
17960244	3702	821632
21828289	3702	821632
21954460	3702	821632
20358261	3702	821636
19921251	3702	821659
22786870	3702	821670
18307782	3702	821679
17122069	3702	821705
23443557	3702	821705
14517332	3702	821718
16887800	3702	821718
20971896	3702	821718
23321285	3702	821718
17971036	3702	821784
19264755	3702	821784
20122158	3702	821784
9349280	3702	821805
9349280	3702	821806
16299171	3702	821806
19941623	3702	821806
22693280	3702	821807
17369372	3702	821808
14690510	3702	821817
16525894	3702	821836
10769244	3702	821849
22072982	3702	821849
17075075	3702	821861
21401744	3702	821861
11402167	3702	821874
8979397	3702	821879
17369427	3702	821879
22171938	3702	821879
22476291	3702	821879
22912871	3702	821879
11943180	3702	821888
20466845	3702	821889
12177468	3702	821891
17237187	3702	821911
17461783	3702	821924
21288266	3702	821924
21309867	3702	821924
22449068	3702	821924
22612335	3702	821924
22634761	3702	821924
11449055	3702	821935
17916636	3702	821939
16139212	3702	821943
22902752	3702	821943
18425128	3702	821960
15247385	3702	821965
16698902	3702	821975
12834401	3702	822008
12932329	3702	822009
16055633	3702	822009
17693533	3702	822017
17026539	3702	822018
19948793	3702	822018
21119058	3702	822018
23463773	3702	822018
16244138	3702	822041
12662310	3702	822061
16902140	3702	822075
23440171	3702	822079
12368506	3702	822105
16263905	3702	822105
21411332	3702	822112
8914512	3702	822117
23133621	3702	822117
14749726	3702	822119
17237187	3702	822119
21625539	3702	822119
10080694	3702	822123
17376028	3702	822159
20220754	3702	822159
17916636	3702	822169
15299125	3702	822175
15299125	3702	822177
10364395	3702	822181
1581570	3702	822189
14500984	3702	822207
16714312	3702	822207
20862254	3702	822207
15941401	3702	822246
10102577	3702	822259
19922653	3702	822259
10559441	3702	822265
15533878	3702	822277
21607647	3702	822277
20566565	3702	822287
22171938	3702	822296
16766671	3702	822298
12837952	3702	822317
21972261	3702	822317
19091878	3702	822318
20430762	3702	822336
15498773	3702	822350
15563621	3702	822359
9349280	3702	822384
20797997	3702	822387
16183838	3702	822389
15820655	3702	822396
21447791	3702	822401
17916636	3702	822411
12356720	3702	822415
18713401	3702	822415
22334670	3702	822415
15546350	3702	822505
11701880	3702	822519
14517332	3702	822519
15908594	3702	822519
16601150	3702	822519
17237354	3702	822519
17557805	3702	822519
17557807	3702	822519
18156217	3702	822519
18774968	3702	822519
19508431	3702	822519
17905859	3702	822537
20035956	3702	822543
16359384	3702	822547
16581911	3702	822547
15561775	3702	822566
16526091	3702	822580
17122069	3702	822593
16243907	3702	822600
22291198	3702	822809
7482765	3702	823150
11891255	3702	823150
19897606	3702	823150
11337587	3702	823327
17257168	3702	823393
19230664	3702	823405
21335373	3702	823426
21447791	3702	823426
16478044	3702	823490
15692178	3702	823531
20418496	3702	823531
17971038	3702	823542
21801253	3702	823542
9763705	3702	823555
9763705	3702	823556
11967096	3702	823557
16243907	3702	823578
20571114	3702	823579
20571114	3702	823580
17704213	3702	823585
17237187	3702	823587
17827277	3702	823605
15247387	3702	823617
1581570	3702	823623
23204407	3702	823634
22880003	3702	823641
23398541	3702	823641
8290626	3702	823650
20870959	3702	823706
17993627	3702	823707
16478044	3702	823710
12172018	3702	823721
17176396	3702	823721
17237187	3702	823721
19075229	3702	823732
19515790	3702	823732
17158604	3702	823740
19794115	3702	823743
19794115	3702	823744
15923338	3702	823805
12509519	3702	823808
21948714	3702	823830
7678768	3702	823835
12650623	3702	823843
18086223	3702	823851
21607647	3702	823882
14526079	3702	823899
16272429	3702	823899
20007448	3702	823899
20675571	3702	823918
18281505	3702	823923
20067996	3702	823923
17889650	3702	823935
18799460	3702	823948
11532165	3702	823950
12417701	3702	823959
18055613	3702	823964
23275581	3702	823964
11115887	3702	823965
14973166	3702	823965
22640471	3702	823971
21613568	3702	823975
22158468	3702	823975
20682769	3702	823983
17075075	3702	824027
22157085	3702	824035
12468727	3702	824036
16415207	3702	824036
16920782	3702	824036
20659279	3702	824036
22595674	3702	824036
14593120	3702	824048
16284776	3702	824072
16284776	3702	824073
19054368	3702	824079
18425128	3702	824086
22889666	3702	824112
21984698	3702	824121
19567704	3702	824128
16367950	3702	824129
18780746	3702	824129
20626648	3702	824129
16461581	3702	824131
16028113	3702	824132
18643977	3702	824140
21435053	3702	824162
17675404	3702	824168
18467465	3702	824208
17307925	3702	824214
21357490	3702	824226
16407451	3702	824229
19741050	3702	824229
21284753	3702	824229
21909364	3702	824229
22196800	3702	824229
18563437	3702	824238
15367721	3702	824251
20643354	3702	824251
22669825	3702	824251
18390592	3702	824260
11292073	3702	824261
12366804	3702	824280
11402196	3702	824293
20016781	3702	824293
18281508	3702	824309
20876100	3702	824318
10940464	3702	824322
10940464	3702	824323
17656722	3702	824340
21105933	3702	824340
22623414	3702	824340
17085765	3702	824343
17085765	3702	824346
22048901	3702	824347
16055687	3702	824349
16478044	3702	824349
21546457	3702	824349
16478044	3702	824350
18822296	3702	824351
16167891	3702	824382
16284308	3702	824384
17916636	3702	824395
18055613	3702	824408
22353573	3702	824408
23275581	3702	824408
23170036	3702	824410
18408069	3702	824443
9159954	3702	824451
10561538	3702	824451
10871276	3702	824451
10888666	3702	824451
17237187	3702	824455
12974814	3702	824457
17916636	3702	824459
22010978	3702	824459
10859167	3702	824460
21533644	3702	824484
21874349	3702	824493
21607647	3702	824507
22291198	3702	824509
7920711	3702	824510
16235111	3702	824510
18234664	3702	824510
21182578	3702	824510
21186174	3702	824510
22010034	3702	824510
17287810	3702	824513
20498067	3702	824516
12176998	3702	824518
15494553	3702	824529
17916636	3702	824554
15820655	3702	824557
10555304	3702	824559
9566922	3702	824568
18753286	3702	824581
18505803	3702	824584
11432958	3702	824585
15031414	3702	824585
20150278	3702	824585
8756724	3702	824589
10322541	3702	824589
10631180	3702	824589
17158109	3702	824589
17446396	3702	824589
19228333	3702	824589
20739610	3702	824589
21744091	3702	824589
21935722	3702	824589
22312006	3702	824589
22921914	3702	824589
23444357	3702	824589
19054368	3702	824595
12121446	3702	824601
9426222	3702	824608
15820655	3702	824612
12740375	3702	824626
19376933	3702	824626
19771450	3702	824626
9839461	3702	824629
21607647	3702	824632
22773747	3702	824636
11549767	3702	824637
17553903	3702	824637
22434042	3702	824647
18055610	3702	824649
16367956	3702	824652
17957256	3702	824652
17971038	3702	824652
18539780	3702	824652
21447788	3702	824660
19582143	3702	824664
11489181	3702	824678
15817473	3702	824678
21252225	3702	824692
17916636	3702	824710
19880396	3702	824710
12176998	3702	824712
16942607	3702	824715
18441215	3702	824716
9351242	3702	824727
21233333	3702	824729
8776904	3702	824740
15618414	3702	824740
16045474	3702	824749
17426055	3702	824749
20547563	3702	824754
19054354	3702	824765
21408051	3702	824765
9426607	3702	824773
12881501	3702	824776
16367966	3702	824790
17916636	3702	824790
15618632	3702	824804
16623907	3702	824807
11346951	3702	824836
21607647	3702	824853
11958125	3702	824861
18281506	3702	824863
17260143	3702	824864
17516080	3702	824864
17260143	3702	824865
17516080	3702	824865
10930466	3702	824871
12441300	3702	824880
15564519	3702	824880
19482972	3702	824880
20118228	3702	824880
20626659	3702	824880
11115127	3702	824890
17916636	3702	824896
17662727	3702	824900
11115127	3702	824906
22209875	3702	824908
10632732	3702	824922
19682286	3702	824956
17259263	3702	824988
22334497	3702	824988
22699776	3702	824988
7948902	3702	825019
23167545	3702	825019
16709200	3702	825050
19966073	3702	825066
19684242	3702	825072
22693280	3702	825075
10080694	3702	825076
15128936	3702	825107
12905023	3702	825110
18948541	3702	825111
23394827	3702	825111
16453058	3702	825146
21698459	3702	825146
12953103	3702	825160
21831845	3702	825171
21831845	3702	825172
16478044	3702	825186
11351070	3702	825189
22010978	3702	825189
21607647	3702	825194
19549134	3702	825204
16434475	3702	825206
21070418	3702	825234
21173022	3702	825234
17916636	3702	825246
21252258	3702	825277
11337587	3702	825286
12724534	3702	825286
17307927	3702	825286
22576848	3702	825286
21750030	3702	825297
7920711	3702	825316
16235111	3702	825316
20935247	3702	825317
17496113	3702	825332
16603653	3702	825338
16698945	3702	825338
21533644	3702	825338
10080694	3702	825348
22010978	3702	825349
16581911	3702	825358
12176998	3702	825359
15604708	3702	825362
18952777	3702	825364
21984698	3702	825369
9426607	3702	825376
18298415	3702	825383
23147222	3702	825388
19795213	3702	825403
15533878	3702	825414
18974062	3702	825414
18359753	3702	825435
10594096	3702	825442
10712533	3702	825442
18544630	3702	825446
22696020	3702	825446
17098847	3702	825452
9436980	3702	825473
10398681	3702	825473
12782725	3702	825473
16045473	3702	825473
19106375	3702	825473
20018756	3702	825473
21466556	3702	825473
22042293	3702	825473
22171938	3702	825473
22476291	3702	825473
22912871	3702	825473
23211744	3702	825473
21831845	3702	825481
17600715	3702	825488
18591351	3702	825488
12925595	3702	825505
20626652	3702	825505
17383830	3702	825517
20862254	3702	825517
23520518	3702	825517
14555694	3702	825519
22010978	3702	825521
19392692	3702	825525
22378640	3702	825525
23520518	3702	825532
10398681	3702	825648
10654597	3702	825648
11337587	3702	825648
12468727	3702	825648
12724534	3702	825648
12782725	3702	825648
16045473	3702	825648
16021399	3702	825650
19224217	3702	825654
18028262	3702	825655
10712537	3702	825793
12220264	3702	825793
18218969	3702	825793
21623972	3702	825793
22328157	3702	825797
22551943	3702	825834
16021399	3702	825838
16617333	3702	825857
16581911	3702	825865
17652157	3702	825867
22010978	3702	825880
16792691	3702	825890
18725356	3702	825905
19043666	3702	825905
7579170	3702	826213
12897247	3702	826364
16038894	3702	826364
16513846	3702	826364
16741748	3702	826364
19891706	3702	826364
17675405	3702	826367
17572407	3702	826409
17892444	3702	826420
15842617	3702	826426
17720755	3702	826426
18400935	3702	826426
18761637	3702	826426
10662864	3702	826438
18567826	3702	826458
18567826	3702	826468
22433460	3702	826468
16703358	3702	826470
20133010	3702	826470
19216774	3702	826473
1373374	3702	826505
17916636	3702	826515
7727751	3702	826545
23064319	3702	826583
16113211	3702	826595
19098132	3702	826595
14563928	3702	826609
16792691	3702	826609
18434413	3702	826609
10759522	3702	826623
11698666	3702	826623
12727868	3702	826623
16540484	3702	826623
17140289	3702	826623
17324235	3702	826623
18624638	3702	826623
19584143	3702	826623
20838445	3702	826623
21105923	3702	826623
21931830	3702	826623
20197506	3702	826627
16679457	3702	826630
18952773	3702	826630
19017629	3702	826630
19029297	3702	826630
20194745	3702	826630
21908722	3702	826630
17675405	3702	826631
15546350	3702	826665
18505803	3702	826670
11402167	3702	826671
20077023	3702	826671
21596690	3702	826671
23109687	3702	826671
23331977	3702	826671
19936292	3702	826714
17916636	3702	826716
15494553	3702	826724
9617814	3702	826726
12782725	3702	826728
16028113	3702	826730
21533019	3702	826730
17916636	3702	826765
17586656	3702	826766
18546053	3702	826769
17916636	3702	826770
22163277	3702	826789
22163277	3702	826791
19553203	3702	826799
22873486	3702	826799
14593120	3702	826814
15247385	3702	826833
18952777	3702	826844
12119380	3702	826851
10080694	3702	826868
10080694	3702	826910
17237187	3702	826913
16902140	3702	826934
11209081	3702	826956
18557819	3702	826956
16297850	3702	826958
16297850	3702	826960
15734909	3702	826973
18281719	3702	826973
19000196	3702	826973
20139158	3702	826973
20413648	3702	826973
17827277	3702	826978
16917981	3702	826983
17026539	3702	826983
17172286	3702	826983
23463773	3702	826983
16923017	3702	826984
22576848	3702	826984
16526091	3702	826987
19880797	3702	827009
23384041	3702	827018
10806255	3702	827027
16526091	3702	827028
22010978	3702	827028
22555436	3702	827028
19710230	3702	827039
12724534	3702	827049
17307927	3702	827049
22576848	3702	827049
17827277	3702	827052
21873565	3702	827075
17237187	3702	827078
20675571	3702	827086
18725356	3702	827088
11862947	3702	827102
16236149	3702	827102
17369427	3702	827102
20043234	3702	827102
14729917	3702	827103
17916636	3702	827113
20820784	3702	827114
10341446	3702	827118
10806350	3702	827118
16916932	3702	827123
16916932	3702	827125
18441224	3702	827145
20529854	3702	827145
9681017	3702	827152
15998306	3702	827154
17641820	3702	827154
17916636	3702	827154
12535344	3702	827164
23483879	3702	827183
7716246	3702	827185
19854857	3702	827187
22544867	3702	827208
17675405	3702	827215
14507998	3702	827269
7823904	3702	827273
16227453	3702	827297
22050482	3702	827297
20488895	3702	827307
17916636	3702	827320
22442414	3702	827320
23109687	3702	827330
13129917	3702	827332
18083798	3702	827332
12747832	3702	827336
18836138	3702	827351
18467465	3702	827371
17675405	3702	827381
22048901	3702	827381
10477292	3702	827384
23578926	3702	827384
8998499	3702	827392
14593120	3702	827412
8631820	3702	827430
17916636	3702	827440
10080694	3702	827442
19922653	3702	827446
10200328	3702	827481
11402167	3702	827481
16567499	3702	827481
17898163	3702	827481
17922773	3702	827481
21596690	3702	827481
23109687	3702	827481
21909944	3702	827494
10888666	3702	827505
21321051	3702	827511
21335373	3702	827511
17158604	3702	827529
22363683	3702	827529
16461585	3702	827537
22948308	3702	827542
10662864	3702	827544
10662864	3702	827546
16478044	3702	827546
21645200	3702	827550
10080694	3702	827552
21518051	3702	827555
12834401	3702	827562
19525968	3702	827583
21477884	3702	827587
16367956	3702	827598
11553730	3702	827605
7655508	3702	827607
21909944	3702	827608
22926318	3702	827612
19029297	3702	827626
9090883	3702	827631
15155890	3702	827631
17573799	3702	827631
19554348	3702	827631
21542343	3702	827631
22028461	3702	827631
22357616	3702	827631
19029297	3702	827641
18055610	3702	827706
11389759	3702	827712
19252923	3702	827712
10394943	3702	827713
18305211	3702	827713
19121106	3702	827713
19252923	3702	827713
19549134	3702	827713
21334215	3702	827713
21426424	3702	827713
21742768	3702	827713
15247387	3702	827730
10561538	3702	827757
10871276	3702	827757
10888666	3702	827757
17264065	3702	827773
18397324	3702	827773
16367950	3702	827774
23569225	3702	827774
19656342	3702	827785
21205031	3702	827785
23220822	3702	827785
18055613	3702	827786
19946624	3702	827788
11874905	3702	827839
16792691	3702	827857
8618839	3702	827860
[truncated: 149,817 more rows]
